# Supplementary material
Source: MDPI journal article supplement (https://www.mdpi.com/2073-4395/10/2/205)
Supplement: s1 [file s1]

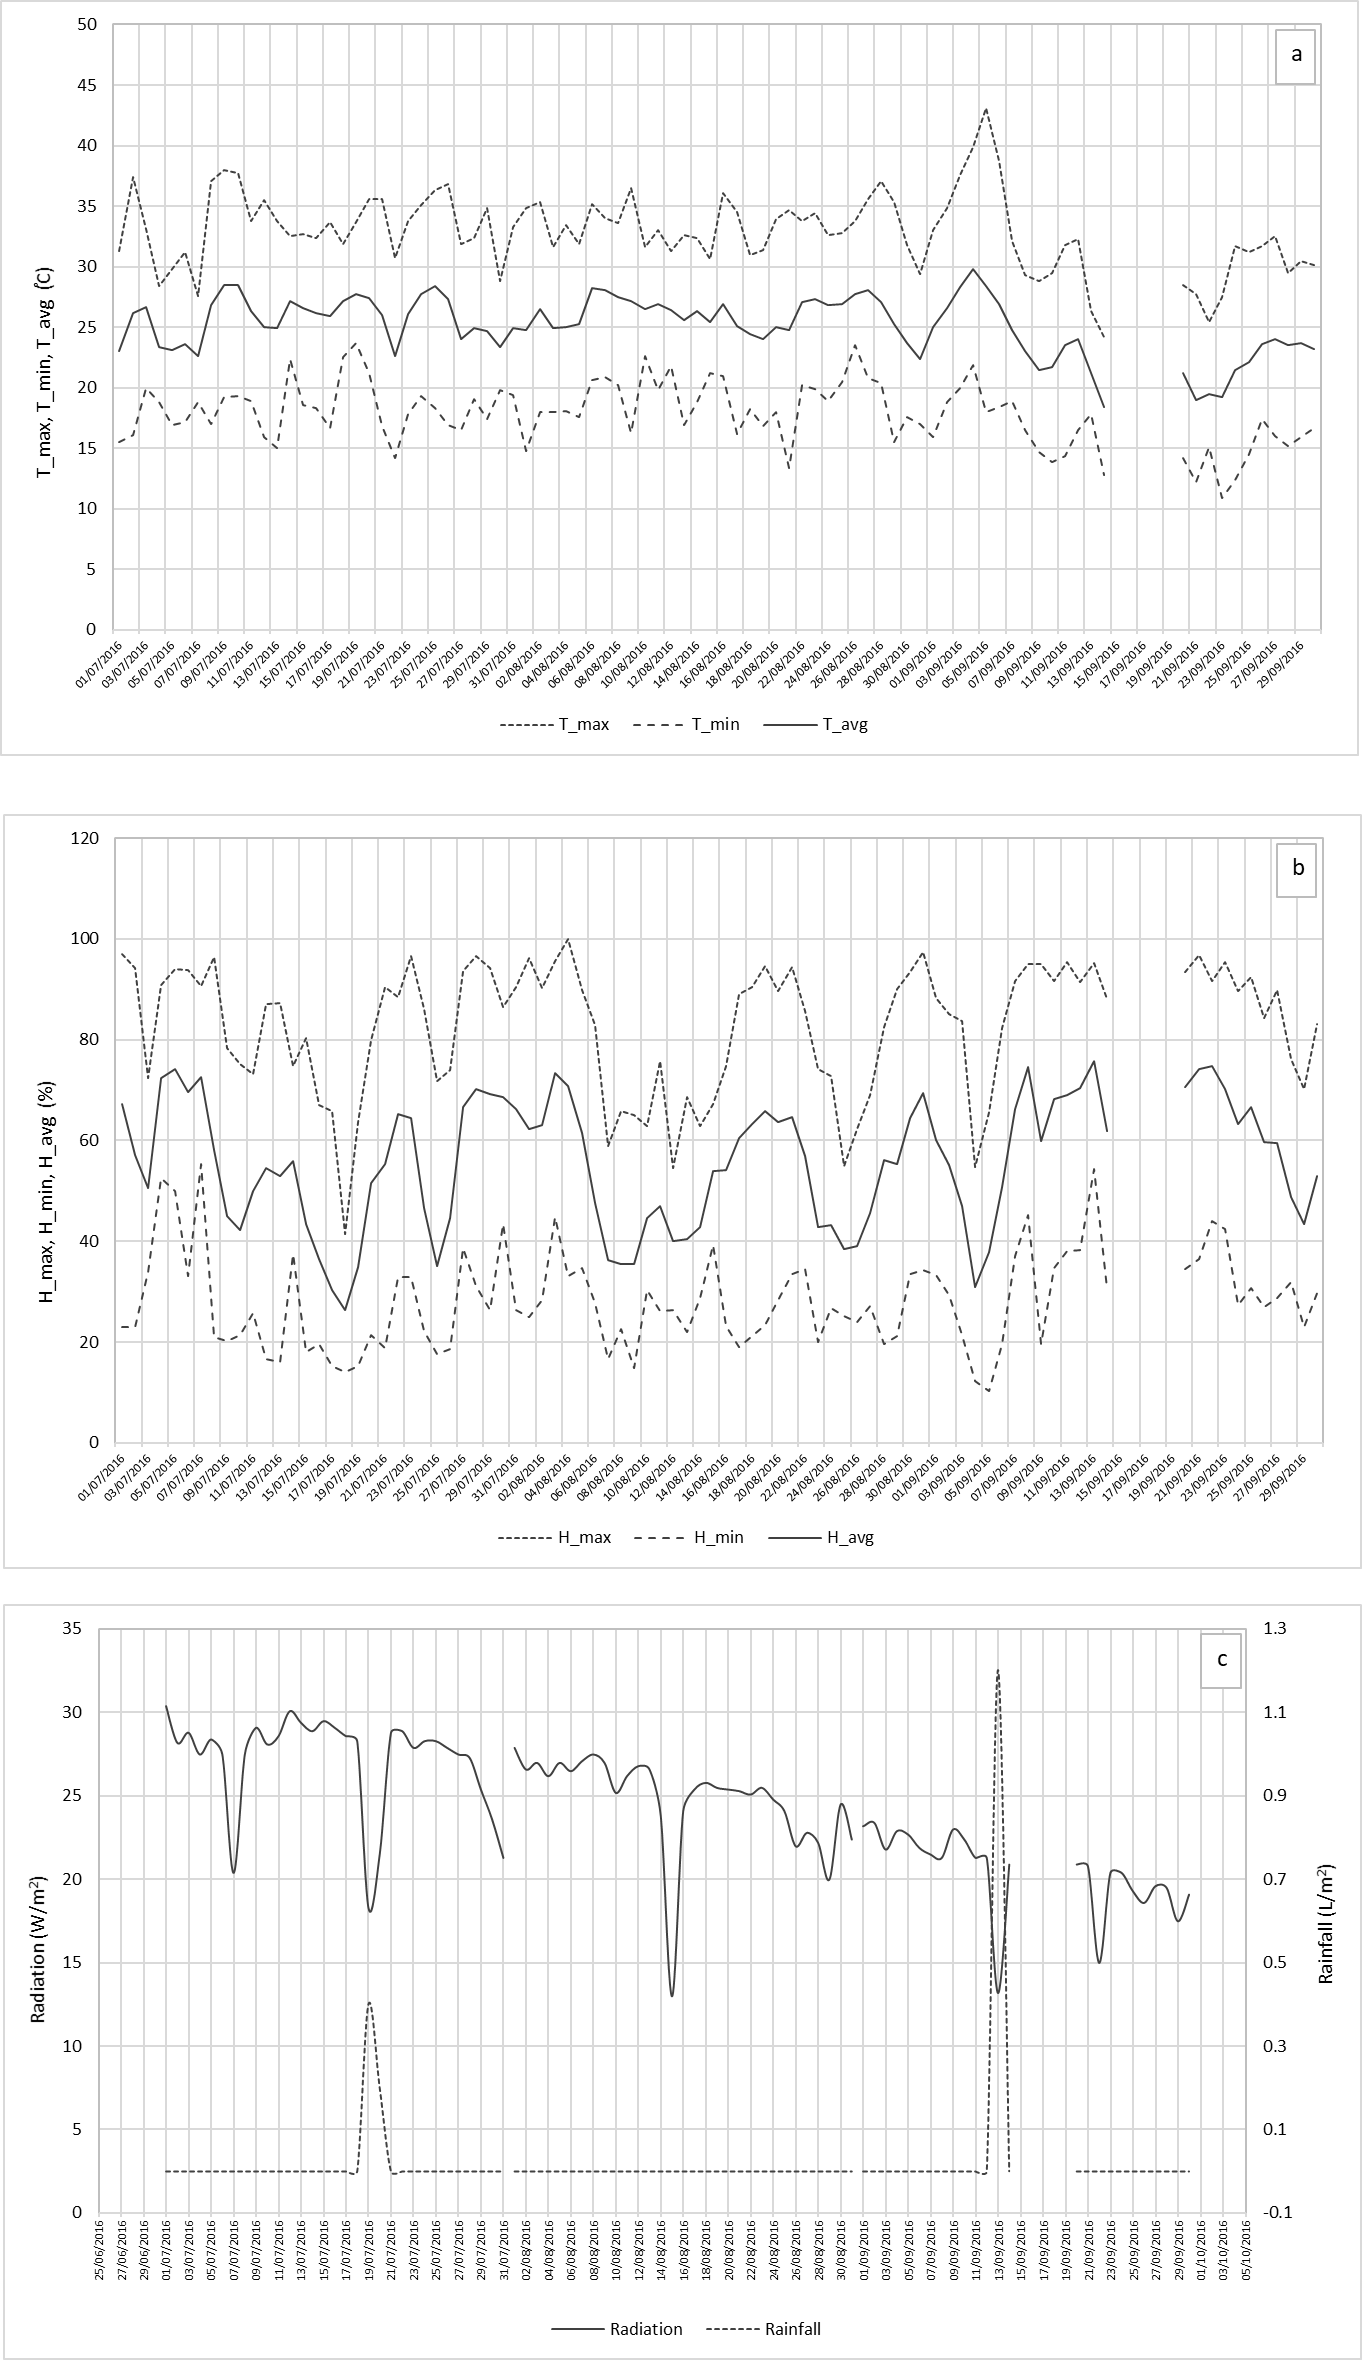


Figure S1a-c. (a) Temperature (°C) (T_max, T_min, T_avg), (b) humidity (%) (H_max, H_min, H_avg) and (c) radiation (W/m2) and rainfall (L/m2) among July and September 2016.


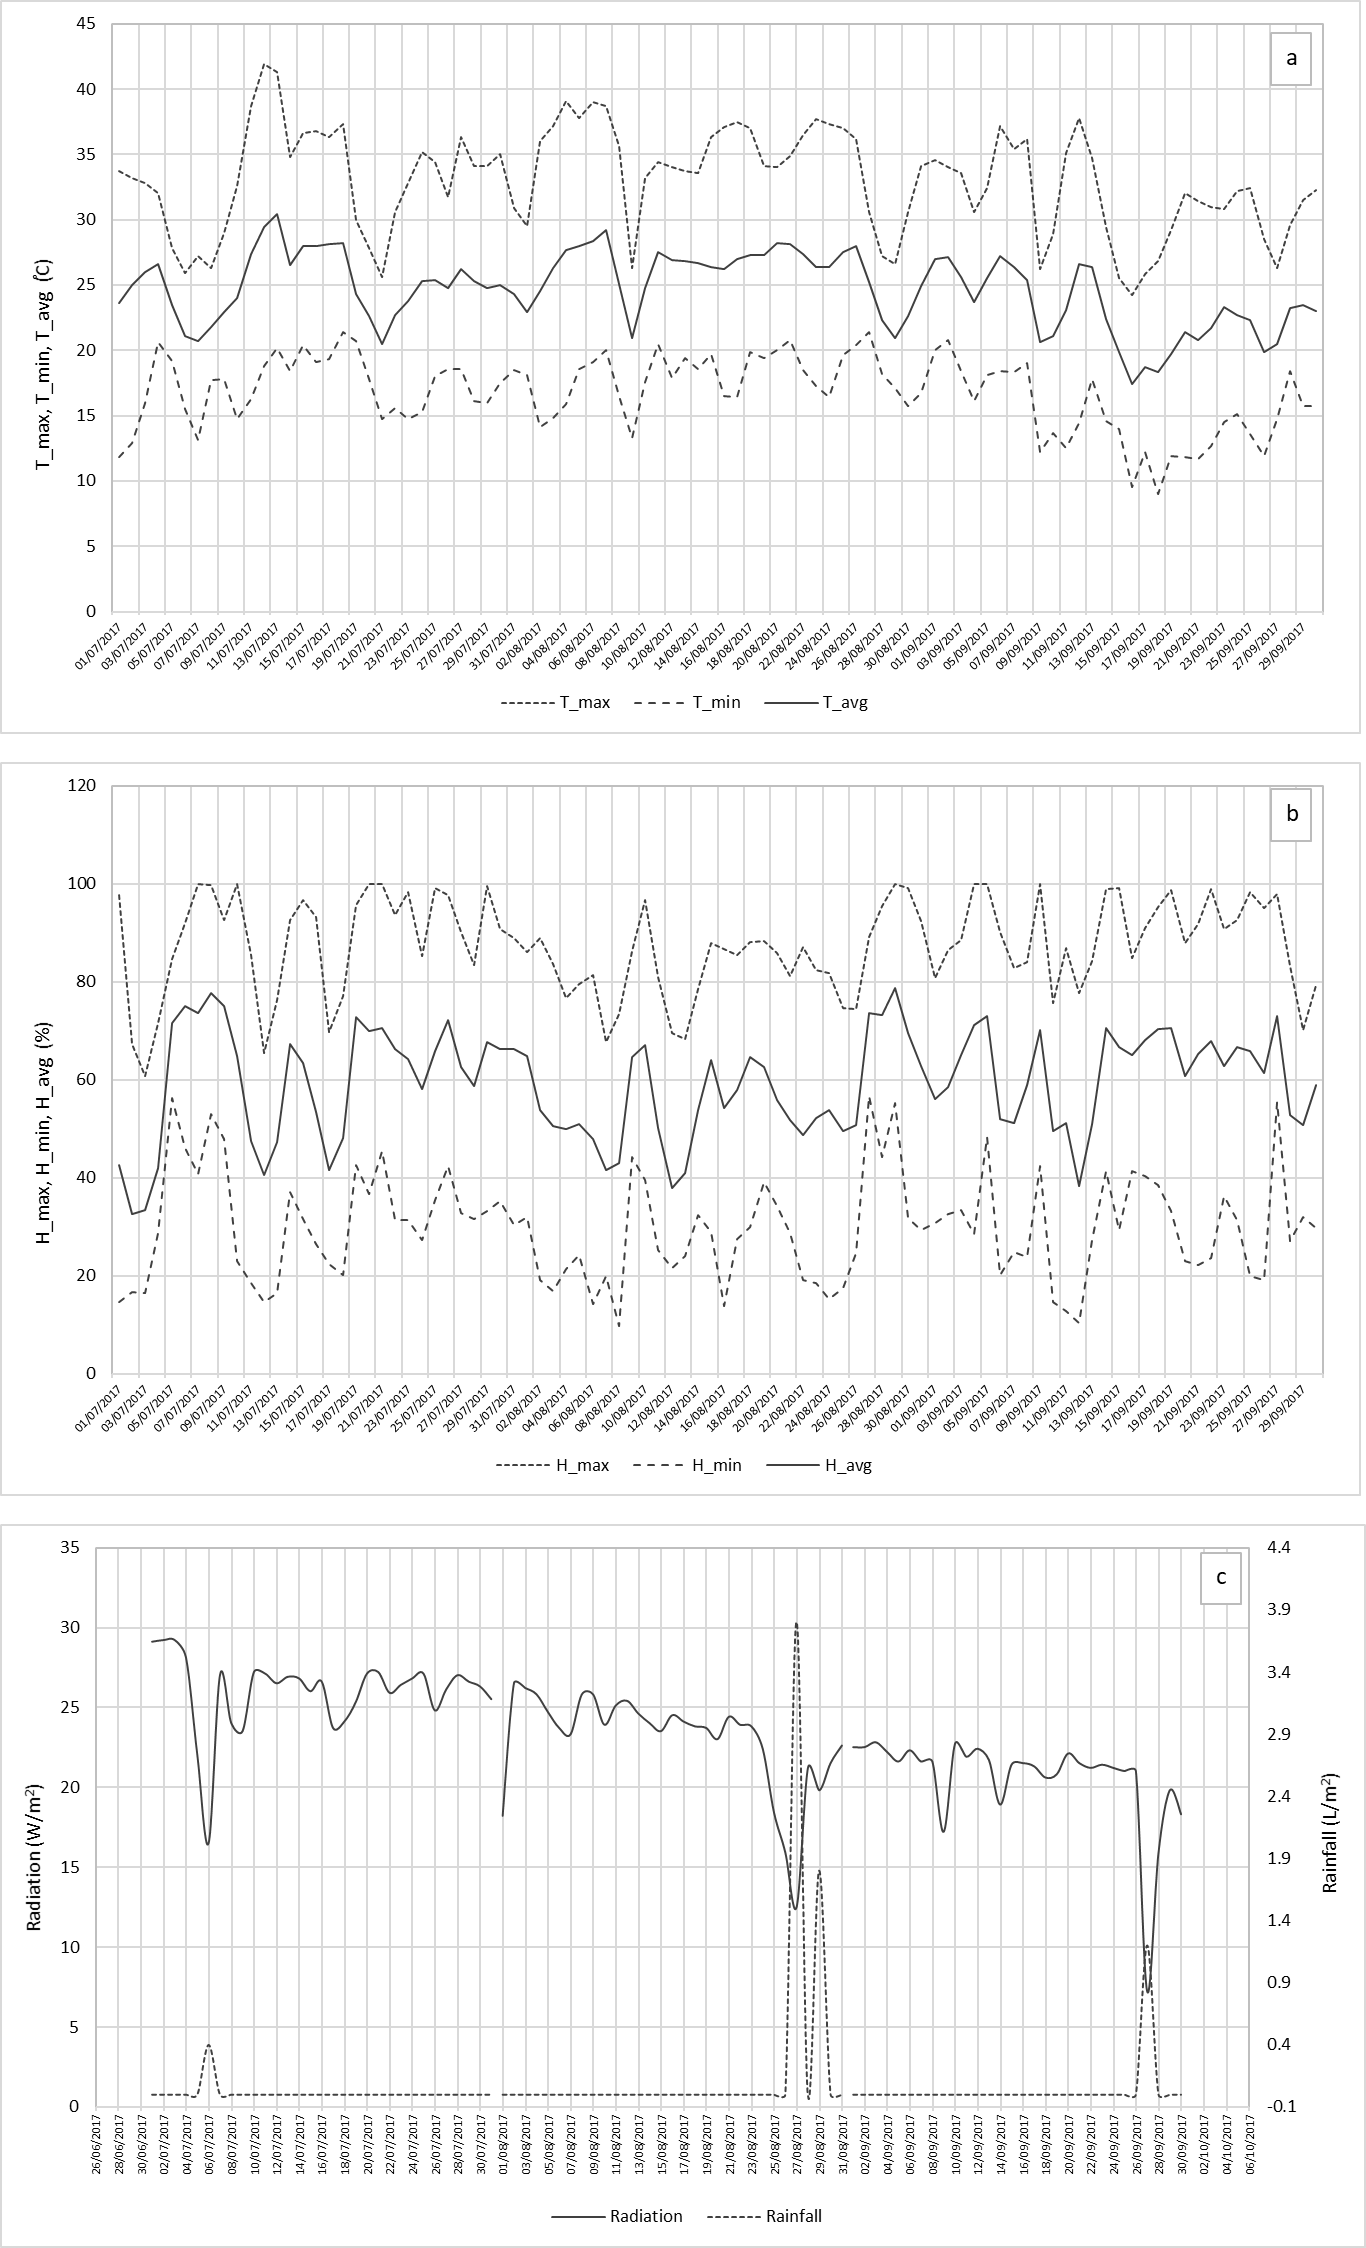


Figure S2a-c. (a) Temperature (°C) (T_max, T_min, T_avg), (b) humidity (%) (H_max, H_min, H_avg) and (c) radiation (W/m2) and rainfall (L/m2) among July and September 2017.
